# Supplementary material for: The Use of Functional Chemical-Protein Associations to Identify Multi-Pathway Renoprotectants
Source: PLoS One. 2014 May 15;9(5):e97906. doi: 10.1371/journal.pone.0097906 (PMC4022655; doi:10.1371/journal.pone.0097906)
Supplement: Table S3 — Nephropathy-related KEGG pathways. (XLS) [file pone.0097906.s003.xls]

## Sheet: Table S3
Table S3. nephropathy-related KEGG pathways.
KEGG pathway	Protein (n)	Benjamini-adjuested P
ABC transporters	21	0.00033
Adipocytokine signaling pathway	31	1.1e-05
Allograft rejection	29	8.9e-13
Antigen processing and presentation	26	0.029
Apoptosis	32	0.00085
Arachidonic acid metabolism	23	0.0014
Asthma	22	9.7e-09
Autoimmune thyroid disease	27	2.8e-06
B cell receptor signaling pathway	28	0.0016
Base excision repair	18	0.00041
Bladder cancer	23	1.1e-05
Caffeine metabolism	7	0.0014
Cell adhesion molecules (CAMs)	37	0.035
Cell cycle	39	0.0047
Chronic myeloid leukemia	27	0.0035
Colorectal cancer	41	2.5e-08
Complement and coagulation cascades	59	8.9e-30
Cytokine-cytokine receptor interaction	106	1.4e-14
Drug metabolism	41	1.2e-13
Drug metabolism	18	0.0051
ECM-receptor interaction	28	0.0088
Endometrial cancer	23	0.00048
Focal adhesion	58	0.0025
Glioma	27	0.00022
Glutathione metabolism	23	0.00027
Graft-versus-host disease	26	1.1e-08
Hematopoietic cell lineage	41	5.5e-08
Homologous recombination	13	0.011
Intestinal immune network for IgA production	30	9.2e-09
Jak-STAT signaling pathway	55	1.4e-05
Linoleic acid metabolism	13	0.011
Maturity onset diabetes of the young	13	0.0037
Melanoma	31	3.6e-05
Metabolism of xenobiotics by cytochrome P450	38	7.2e-12
Mismatch repair	12	0.0059
Natural killer cell mediated cytotoxicity	37	0.039
Non-homologous end-joining	8	0.017
Non-small cell lung cancer	23	0.00083
Nucleotide excision repair	18	0.0064
p53 signaling pathway	27	0.0008
Pancreatic cancer	30	0.00015
Pathways in cancer	129	5.2e-17
PPAR signaling pathway	26	0.0023
Prion diseases	21	6.1e-06
Prostate cancer	40	6.3e-07
Renal cell carcinoma	26	0.0027
Renin-angiotensin system	10	0.0064
Retinol metabolism	25	0.00011
Small cell lung cancer	32	0.00045
Steroid hormone biosynthesis	24	1.6e-05
Systemic lupus erythematosus	37	0.00021
T cell receptor signaling pathway	37	0.0011
TGF-beta signaling pathway	27	0.028
Thyroid cancer	15	0.0015
Toll-like receptor signaling pathway	40	2.2e-05
Type I diabetes mellitus	30	3.7e-11
Viral myocarditis	28	0.00068
Wnt signaling pathway	43	0.015
